# Supplementary material for: Colorimetric screening of β-glucosidase inhibition based on gold nanocomposites
Source: Royal Society of Chemistry journal article supplement (doi:10.1039/c3ay41233d), 2013-11-26
Supplement: c3ay41233d.pdf [file c3ay41233d.pdf]

## **SUPPLEMENTARY INFORMATION**

### **Colorimetric screening of $\beta$ -glucosidase inhibition based on gold nanocomposites**

Cui Lai<sup>a,b</sup>, Guang-Ming Zeng<sup>a,b,\*</sup>, Dan-Lian Huang<sup>a,b,\*</sup>, Mei-Hua Zhao<sup>a,b</sup>, Ming Chen<sup>a,b</sup>, Zhen Wei<sup>a,b</sup>,  
Chao Huang<sup>a,b</sup>, Piao Xu<sup>a,b</sup>, Ning-Jie Li<sup>a,b</sup>, Xue Li<sup>c</sup>, Chen Zhang<sup>a,b</sup>

<sup>a</sup> *College of Environmental Science and Engineering, Hunan University, Changsha 410082, Hunan, PR China*

<sup>b</sup> *Key Laboratory of Environmental Biology and Pollution Control (Hunan University), Ministry of Education, Changsha 410082, Hunan, PR China*

<sup>c</sup> *Department of Bioengineering and Environmental Science, Changsha University, Changsha 410003, Hunan, PR. China*

---

\* Corresponding author at: College of Environmental Science and Engineering, Hunan University, Changsha, Hunan 410082, China. Tel.: +86-731-88822754; fax: +86-731-88823701. E-mail address: zgming@hnu.edu.cn (G.M. Zeng) and huangdanlian1981@163.com(D.L.Huang).

**Table S1.** Determination of  $\beta$ -glucosidase activity in the compost extracts sample

| Samples | $\beta$ -glucosidase activity ( $\text{U L}^{-1}$ ) |                                                               |                                                           | R.S.D.<br>(%) |
|---------|-----------------------------------------------------|---------------------------------------------------------------|-----------------------------------------------------------|---------------|
|         | Added                                               | Detected using gold-cellobiose<br>nanocomposites <sup>a</sup> | Detected by DNS<br>colorimetric assay method <sup>b</sup> |               |
| C1      | 10.0                                                | $11.8 \pm 0.56$                                               | $9.8 \pm 0.73$                                            | 4.7           |
| C2      | 30.0                                                | $32.1 \pm 1.54$                                               | $30.4 \pm 1.45$                                           | 4.8           |
| C 3     | 50.0                                                | $55.6 \pm 2.25$                                               | $51.8 \pm 1.20$                                           | 4.0           |
| C 4     | 90.0                                                | $92.4 \pm 3.58$                                               | $88.6 \pm 2.55$                                           | 3.9           |

<sup>a,b</sup> Means  $\pm$  standard deviations of three measurements.

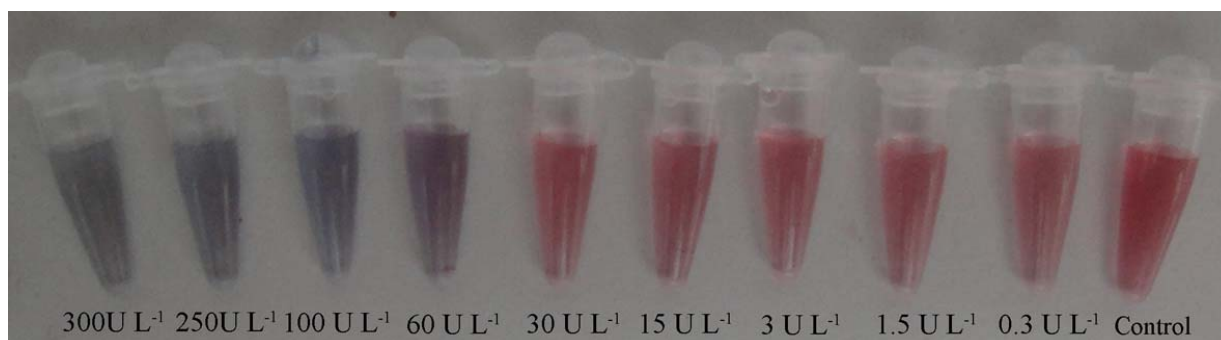

**Fig. S1.** The  $\beta$ -glucosidase concentration-dependent color changes. From left to right: 300 U L<sup>-1</sup>; 250 U L<sup>-1</sup>; 100 U L<sup>-1</sup>; 60 U L<sup>-1</sup>; 30 U L<sup>-1</sup>; 15 U L<sup>-1</sup>; 3 U L<sup>-1</sup>; 1.5 U L<sup>-1</sup>; 0.3 U L<sup>-1</sup>; Control sample.

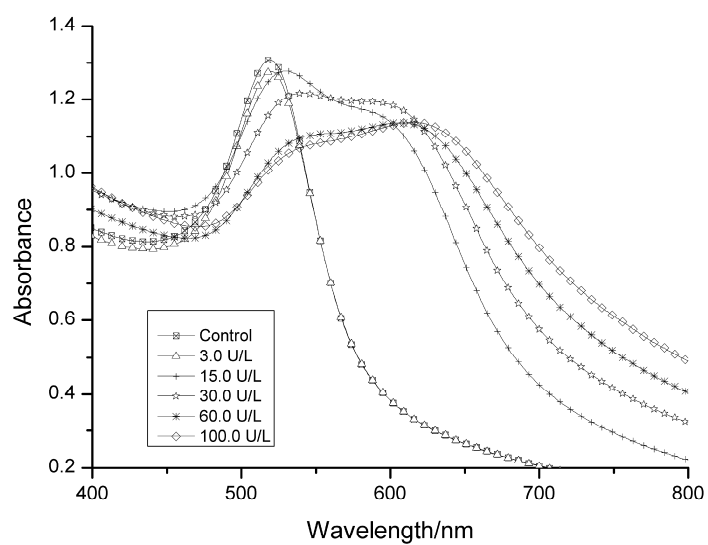

**Fig. S2.** Absorption spectra of the gold-cellobiose nanocomposites at 20 min after incubation with different concentrations of  $\beta$ -glucosidase (from  $3 \text{ U L}^{-1}$  to  $100 \text{ U L}^{-1}$ ).
